# Supplementary material for: Cu-Doped KCl Unfolded Band Structure and Optical Properties Studied by DFT Calculations
Source: Preprints.org preprint supplement (doi:10.20944/preprints202007.0433.v1), 2020-07-19
Supplement: Supplementary file 1 [file supplemetary_material.doc.docx]

**Cu-Doped KCl Unfolded Band Structure and Optical Properties Studied by DFT Calculations.**

Cesar Castillo-Quevedo1, Jose Luis Cabellos2*, Raul Aceves2,, Roberto Núñez-González3 , and Alvaro Posada-Amarillas2*

1Departamento de Fundamentos del Conocimiento, Centro Universitario del Norte, Universidad de Guadalajara, Carretera Federal No. 23, Km. 191, C.P. 46200, Colotlán, Jalisco, México

2Departamento de Investigación en Física, Universidad de Sonora, Blvd. Luis Encinas y Rosales S/N, 83000 Hermosillo, Sonora, México.

3Departamento de Matemáticas, Universidad de Sonora, Blvd. Luis Encinas y Rosales S/N, 83000 Hermosillo, Sonora, México.

*Corresponding authors: jose.cabellos@unison.mx, posada@cifus.uson.mx


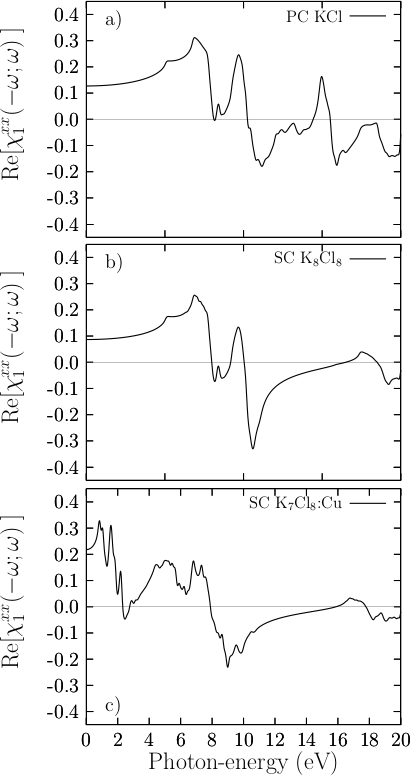


Figure 1S (color online) Upper panel (a) shows the calculated real part of the PC KCl . Middle panel (b) shows the real part for the pristine SC K8Cl8  system. Lower panel (c) show the real part of the doped SC K7Cl8 :Cu system.
